# Supplementary material for: Molecular Analysis of KCNJ10 on 1q as a Candidate Gene for Type 2 Diabetes in Pima Indians
Source: Oxford University Press journal article supplement (doi:10.2337/diabetes.51.11.3342), 2002-11-01
Supplement: 3342-sup-db02_0228_r1_online_appendix_1.doc [file 3342-sup-db02_0228_r1_online_appendix_1.doc]

Primers used for genomic PCR and comparative sequencing of *KCNJ10*

| Designation | PCR primer (5’-3’) | Gene segment |
| --- | --- | --- |
| *KCNJ10*-F1  *KCNJ10*-R1 | CATAGCTTCAACTCACACTGC  CAAGTGGATATAGTAGGCAAG | 5’ region |
| *KCNJ10*-F2  *KCNJ10*-R2 | ACCATTGCCACGCTGATTTG  CCAGTGTTACCATAT TGAATTG | 5’ region |
| *KCNJ10*-F3  *KCNJ10*-R3 | CTTATCTTATGGCTTTTAGTGG  AGCAGAAGATTCAGGTGCTG | 5’ region |
| *KCNJ10*-R4 | GGAAATGAATTCAGGACCGG | 5’ region |
| *KCNJ10*-F5  *KCNJ10*-R5 | GGAGACGGTGAACAACACG  CAATGGGAGAGTGGAGCG | Promoter |
| *KCNJ10*-F6  *KCNJ10*-R6 | CTGCAGCTGTCTGGGTCTC  GGAGCAGAGCTGTGCGAC | Promoter  Exon 1 |
| *KCNJ10*-F7  *KCNJ10*-R7 | GGACAAGCCCTTATCTGATC  CTTCCTTAGATGAAAGGGCTG | Exon 1  Intron 1 |
| *KCNJ10*-MS.F’  *KCNJ10*-MS.R’ | CTAACTCTCCAGAGACATCG  CAGGAGGCTCCATTTGGGAGT | Intron 1  Exon1 |
| *KCNJ10*-F8  *KCNJ10*-R8 | GTTGGAGGAGTCATTAAGGG  GCCTCAAGTCACCAAACTTC | Exon 2 |
| *KCNJ10*-F9  *KCNJ10*-R9 | AGTGGCTTAGAAGGCCTCAG  TCCAATTCTCTGAGAACAGAG | Exon 2 |
| *KCNJ10*-F10  *KCNJ10*-R10 | TTCTGACCATAAGCTAGAACC  GAAGAAGGATCTAGGCTGAG | Exon 2  3’ region |
| *KCNJ10*-F11  *KCNJ10*-R11 | AAAAGAGTCCAGTACCCAGG  CCTTCCAGCATTGCCTAATG | 3’ region |
| *KCNJ10*-F12  *KCNJ10*-R12 | TGTTAAGGTTTGGGCAGGAG  AGACCAGAAAGCACTCTAGGG | 3’ region |
| *KCNJ10*-F13  *KCNJ10*-R13 | AGATCAAACTCAGCCTATTCC  GTTTACTGTAGATGGACACCG | 3’ region |
| *KCNJ10*-F14  *KCNJ10*-R14 | AGAGCCTTGCAGAGAAACAC  GATAGGAAGGTATAGACACAC | 3’ region |
| *KCNJ10*-F15  *KCNJ10*-R15 | TGAATGTTAATTCCTCCCTCC  TCTTTTGTCAGGACTCTCCG | 3’ region  Exon 2 |
| *KCNJ10*-F16  *KCNJ10*-R16 | CAAGGTGTATTACAGTCAGAC  CTCACTGATGTAGCGGAAGC | Exon 2 |
| *KCNJ10*-F17  *KCNJ10*-R17 | TGTGGTATCTGGTAGCTGTG  TTGGTTTGGTGGGTCTGAAG | Exon 2 |
| *KCNJ10*-F18  *KCNJ10*-R18 | CAAGCCCTGCCTCATGATC  AAGTCAGCTATGTATTTACCAC | Exon 2 |
| *KCNJ10*-F19  *KCNJ10*-R19 | CACCAGTGCCACCTGTCA G  CATCAGACATTGCTGATGCG | Exon 2 |
| *KCNJ10*-3’-1F  *KCNJ10*-3'-1R | GTGTGTGTCTATACCTTCCTAT  CTGCTGATATTCCAAGTCCAC | 3’-UTR |
| *KCNJ10*-3'-2F | CGAGCTTTAGAAGCAGCCAG | 3’-UTR |
| *KCNJ10*-3'-3F  *KCNJ10*-3'-3R | GGAAATATTCAGAGACTTTAGC  GGCTAGAGCAATAGCAGCTC | 3’-UTR |
| *KCNJ10*-3'-4F  *KCNJ10*-3'-4R | CATGAAGTACACTGTATTTCCG  AGCACATTGCAGAGATTTCG | 3’-UTR |
| *KCNJ10*-3'-5F  *KCNJ10*-3'-5R | CAGCTGCTCTAGGGGATG  CTTGACAGTCTTGGTTTAGCT | 3’-UTR |
| *KCNJ10*-3'-6F  *KCNJ10*-3'-6R | ATGGATGACTCTTTGGTTGTC  GAGATTTGAGGGAAGAAATGC | 3’-UTR |
| *KCNJ10*-3'-7F  *KCNJ10*-3'-7R | GTTGCCAGTTTTCCTTATATATC  GTTCCTGTCCCTGTGAAATGT | 3’-UTR |

The primer direction indicated by F (forward) and R (reverse), respectively, is in accordance with the transcriptional orientation of the gene.

Characteristics of SNP markers identified in *KCNJ10*

| Designation Detailsa | Location | SNP | Typing Method | PCR Primer (5’-3’) | Frequency |
| --- | --- | --- | --- | --- | --- |
| *KCNJ10*-SNP1* New | Promoter | T/C | RFLP (*Aci I*) | F-ACCATTGCCACGCTGATTTG  R-CCAGTGTTACCATATTGAATTG | 0.33/0.67 |
| *KCNJ10*-SNP2* rs#2820585 | Intron1 | T/C | Mismatch PCR/RFLP (*RsaI*) | F-CTAACTCTCCAGAGACATCG  R-CAGGAGGCTCCATTTGGGAGT | 0.33/0.67 |
| *KCNJ10*-SNP3 New | Exon2 | G/A | RFLP (*HinfI*) | F-CAC CAG TGC CAC CTG TCA G  R-CAT CAG ACA TTG CTG ATG CG | 0.05/0.95 |
| *KCNJ10*-SNP4 rs#2486253 | 3’-UTR | G/T | RFLP (*EcoRV*) | F-AGA TCA AAC TCA GCC TAT TCC  R-GTT TAC TGT AGA TGG ACA CCG | 0.14/0.86 |
| *KCNJ10*-SNP5 rs#1053074 | 3’-UTR | T/G | Pyrosequencing | F-GTGTGTGTCTATACCTTCCTAT  R-AGAAGATGCCAGATCGCATTA | 0.61/0.39 |
| *KCNJ10*-SNP6 New **a** | 3’-UTR | A/G | Sequencing | F-GTGTGTGTCTATACCTTCCTAT  R-CTGCTGATATTCCAAGTCCAC | 0.05/0.95 |
| *KCNJ10*-SNP7 New **a** | 3’-UTR | T/C | Sequencing | F-GTTGCCAGTTTTCCTTATATATC  R-GTTCCTGTCCCTGTGAAATGT | 0.03/0.97 |
| *KCNJ10*-SNP8 New **a** | 3’-UTR | T/C | Pyrosequencing | F-GAATCCTAAGACATATGAGACA  R-GTTCCTGTCCCTGTGAAATGT | 0.75/0.25 |

*SNP1 and SNP2 are in a complete linkage disequilibrium

**a** New indicates novel SNPs, and “rs” numbers correspond to entries in dbSNP
